# Supplementary material for: Diversity and Distribution of Viruses Infecting Wild and Domesticated Phaseolus spp. in the Mesoamerican Center of Domestication
Source: Viruses. 2021 Jun 16;13(6):1153. doi: 10.3390/v13061153 (PMC8235658; doi:10.3390/v13061153)
Supplement: Supplementary file 1 [file viruses-13-01153-s001.zip]

Archive with 8 entries (8 files):
- Code for heatmap.pdf
- Figure S1.jpg
- Figure S2.jpg
- Figure S3.jpg
- Figure S4.jpg
- Figure S5.jpg
- Supplementary Figures names and description.pdf
- Supplementary Tables.xlsx
