# Supplementary material for: Diversity and Distribution of Viruses Infecting Wild and Domesticated Phaseolus spp. in the Mesoamerican Center of Domestication
Source: Viruses. 2021 Jun 16;13(6):1153. doi: 10.3390/v13061153 (PMC8235658; doi:10.3390/v13061153)
Supplement: Supplementary file 1 [file viruses-13-01153-s001.zip › Supplementary Tables.xlsx]

## Sheet: Supplementary Table S1
Supplementary Table S1: Summary of samples, libraries and viruses identified in domesticated and wild bean from the Mesoamerican center of domestication of common bean and Nayarit, Mexico
Library name	NCBI SRA number	Sample name	NCBI Biosample number	Organism	Cultivar	Type	Stages of development *	Symptoms		Geographic location	Tissue	Collection date	Latitude and longitude	Municipalities	Localities	Reconstructed genome										RT-PCR or PCR confirmation				Comments
								Virus-like	Others							Reference genome	Viral species identified				Lenght (nt)	Coverage (%)	Nucleotide Identity (%)	GenBank accesion number		Viruses detected	Fragment (bp)		GenBank accesion number
																	Virus name	Acronym	Genus	Family							Amplified	Secuenced
Guanajuato
Samples of domesticated bean
CG1Ls	SRX3218002	CG1	SAMN06246775	P. vulgaris	Flor de Mayo Dolores	Flor de Mayo	R8	RCV, LCur		Mexico: Guanajuato	Leaf	29-Jan-14	20.581433 N 100.820639 W	Celaya	Roque	AB719397	Phaseolus vulgaris alphaendornavirus 1	PvEV-1	Alphaendornavirus	Endornaviridae	14071	100	99	MG640415		PvEV-1	~1020	714	MG601991
CG3Ls	SRX3218003	CG3	SAMN06246776	P. vulgaris	U	Flor de Junio	R8	CLL		Mexico: Guanajuato	Leaf	2014-05-29	20.218672 N 101.036442 W	Salvatierra	Cupareo	KT456287	Phaseolus vulgaris alphaendornavirus 1	PvEV-1	Alphaendornavirus	Endornaviridae	13766	97.8	98	No Submitted		PvEV-1	~1020	979	MG601992	Partial assembled genome with stop codons
																AB719398	Phaseolus vulgaris alphaendornavirus 2	PvEV-2	Alphaendornavirus	Endornaviridae	14197	95.8	97	No Submitted		PvEV-2	~990	982	MG601998	Partial assembled genome with stop codons
CG9Ls	SRX3218000	CG9	SAMN06246777	P. vulgaris	U	Flor de Junio	R7	LCup, M		Mexico: Guanajuato	Leaf	2014-05-29	20.253122 N 101.201286 W	Yuriria	Puquichapio	AB719398	Phaseolus vulgaris alphaendornavirus 2	PvEV-2	Alphaendornavirus	Endornaviridae	13950	94.1	97	No Submitted		PvEV-2	~990	952	MG601999	Partial assembled genome with stop codons
																KT456287	Phaseolus vulgaris alphaendornavirus 1	PvEV-1	Alphaendornavirus	Endornaviridae	13525	96.1	98	No Submitted		PvEV-1	~1020	913	MG601993	Partial assembled genome with stop codons
CG13Ls	SRX3218001	CG13	SAMN06246778	P. vulgaris	Pinto Saltillo	Pinto	R8	NS		Mexico: Guanajuato	Leaf	2014-05-29	20.401194 N 101.242519 W	Valle de Santiago	Rincón de Parangueo	KT456287	Phaseolus vulgaris alphaendornavirus 1	PvEV-1	Alphaendornavirus	Endornaviridae	12773	90.8	98	No Submitted		PvEV-1	~1020	971	MG601994	Partial assembled genome with stop codons
																AB719398	Phaseolus vulgaris alphaendornavirus 2	PvEV-2	Alphaendornavirus	Endornaviridae	14222	96	97	No Submitted		PvEV-2	~990	970	MG602000	Partial assembled genome with stop codons
CG17Ls	SRX3218006	CG17	SAMN06246779	P. vulgaris	Azufrado Higuera	Azufrado	R8	CLL		Mexico: Guanajuato	Leaf	2014-05-31	20.587389 N 100.824986 W	Celaya	Roque	AB719397	Phaseolus vulgaris alphaendornavirus 1	PvEV-1	Alphaendornavirus	Endornaviridae	14067	100	99	MG640416		PvEV-1	~1020	885	MG601995
																NA	Badnavirus-like sequence	PvBV-CG17	Putative Badnavirus	Caulimoviridae	1639	NA	NA	No Submitted		PvBV-CG17	~1400	545	No Submitted	Badnavirus-like sequence
CG18Ls	SRX3218007	CG18	SAMN06246780	P. vulgaris	Janasa	Azufrado	R8	GVB		Mexico: Guanajuato	Leaf	2014-05-31	20.587389 N 100.824983 W	Celaya	Roque	AB719397	Phaseolus vulgaris alphaendornavirus 1	PvEV-1	Alphaendornavirus	Endornaviridae	14071	100	99	MG640417		PvEV-1	~1020	669	MG601996
																AB719398	Phaseolus vulgaris alphaendornavirus 2	PvEV-2	Alphaendornavirus	Endornaviridae	14814	100	98	MG640418		PvEV-2	~990	899	MG602001
CG28Ls	SRX3218004	CG28	SAMN06246781	P. vulgaris	U	Ejotero	R6	B, GVB, LCup		Mexico: Guanajuato	Leaf	24-Apr-14	20.587389 N 100.824978 W	Celaya	Roque	KU896809	Bean common mosaic virus	BCMV	Potyvirus	Potyviridae	10060	99	99	MG640401		BCMV	~900	715	MG601970
CG32Ls	SRX3218005	CG32	SAMN06246782	P. acutifolius	U	Tepari	R6	GVB, LCup		Mexico: Guanajuato	Leaf	24-Apr-14	20.587389 N 100.824972 W	Celaya	Roque	KU896809	Bean common mosaic virus	BCMV	Potyvirus	Potyviridae	10062	99	99	MG640402		BCMV	~900	720	MG601979
CG43Ls	SRX3217998	CG43	SAMN06246783	P. vulgaris	U	U	R7 y R8	B, LCur		Mexico: Guanajuato	Leaf	30-Apr-14	20.863944 N 101.505053 W	Romita		MH024840	Bean common mosaic virus	BCMV	Potyvirus	Potyviridae	10065	99	97	MG640403		BCMV	~900	720	MG601971
CG45Ls	SRX3217999	CG45	SAMN06246784	P. vulgaris	U	Peruano	R7 y R8	B, CLL		Mexico: Guanajuato	Leaf	30-Apr-14	20.866475 N 101.505275 W	Romita		KU896809	Bean common mosaic virus	BCMV	Potyvirus	Potyviridae	10062	99	99	MG640404		BCMV	~900	715	MG601980
Samples of wild bean
SG1Ls	SRX3217995	SG1-1	SAMN06246808	P. vulgaris	NA	Wild bean	R5	NS		Mexico: Guanajuato	Leaf	2015-03-25	20.640814 N 101.686297 W	Cueramaro		KT456287	Phaseolus vulgaris alphaendornavirus 1	PvEV-1	Alphaendornavirus	Endornaviridae	11675	83	94	No Submitted		PvEV-1	NR	NR	NA	Partial assembled genome with stop codons
SG3-5Ls	SRX3217994	SG3-5	SAMN06246812	P. vulgaris	NA	Wild bean	R8	CLL		Mexico: Guanajuato	Leaf	2015-03-25	20.62645 N 101.685317 W	Cueramaro			ND	ND								ND
SG5Ls	SRX3217997	SG5	SAMN06246809	P. vulgaris	NA	Wild bean	R5	IC		Mexico: Guanajuato	Leaf	2015-03-25	20.618217 N 101.711294 W	Cueramaro	Ojo de Agua		ND	ND								ND
SG5-136Lc	SRX4594741	SG5-1	SAMN06246813	P. vulgaris	NA	Wild bean	R5	NS	Ant	Mexico: Guanajuato	Leaf	2015-03-25	20.618217 N 101.711289 W	Cueramaro	Ojo de Agua		ND	ND								ND
		SG5-3	SAMN06246814	P. vulgaris	NA	Wild bean	R5	IC		Mexico: Guanajuato	Leaf	2015-03-25	20.618217 N 101.711278 W													ND
		SG5-6	SAMN06246815	P. vulgaris	NA	Wild bean	R5	NS		Mexico: Guanajuato	Leaf	2015-03-25	20.618217 N 101.711297 W													ND
SG6-1Ls	SRX4594740	SG6-1	SAMN06246810	P. microcarpus	NA	Wild bean	R5	CLL		Mexico: Guanajuato	Leaf	2015-03-25	20.610417 N 101.72925 W	Cueramaro	San Jose Ojo de Agua el Novillero		ND	ND								ND
SG7-245Lc	SRX4594739	SG7-2	SAMN06246816	P. vulgaris	NA	Wild bean	R8	NS		Mexico: Guanajuato	Leaf	2015-03-25	20.610417 N 101.72925 W	Cueramaro	San Jose Ojo de Agua el Novillero		ND	ND								ND
		SG7-4	SAMN06246817	P. vulgaris	NA	Wild bean	R8	NS		Mexico: Guanajuato	Leaf	2015-03-25	20.610417 N 101.729256 W													ND
		SG7-5	SAMN06246818	P. vulgaris	NA	Wild bean	R6 y R7	NS	R	Mexico: Guanajuato	Leaf	2015-03-25	20.610417 N 101.729261 W													ND
SG27-3Ls	SRX3217996	SG27-3	SAMN06246811	P. vulgaris	NA	Wild bean	R6	NS	R	Mexico: Guanajuato	Leaf	15-Apr-15	20.613167 N 101.865283 W	Manuel Doblado	Guayabo de Muñoz	MH024840	Bean common mosaic virus	BCMV	Potyvirus	Potyviridae	10071	99	97	MG640400		BCMV	~900	684	MG601981
SG29Ls	SRX4594738	SG29	SAMN06246805	P. leptostachyus	NA	Wild bean	R5	NS		Mexico: Guanajuato	Leaf	2015-03-23	20.288872 N 101.272933 W	Valle de Santiago	El Armadillo	NA	Phaseolus leptostachyus alphaendornavirus	PlepEV	Putative Alphaendornavirus	Endornaviridae	3581	NA	NA	MT792848		PlepEV	~1100	1076	No Submitted	Partial assembled genome of RdRp domain of a putative new alphaendornavirus
SG30CLs	SRX4594737	SG30C	SAMN06246806	P. vulgaris	NA	Wild bean	R5	LCur		Mexico: Guanajuato	Leaf	03-Apr-15	20.288283 N 101.272883 W	Valle de Santiago	El Armadillo		ND	ND								ND
SG66Ls	SRX4594736	SG66	SAMN06246807	P. microcarpus	NA	Wild bean	R5	NS		Mexico: Guanajuato	Leaf	2015-03-24	20.412597 N 101.751067 W	Penjamo	Rancho de Peña		ND	ND								ND
Jalisco
Samples of domesticated bean
CJ16-25Lc	SRX3217973	CJ16	SAMN06246785	P. vulgaris	NI	NI	R5	B, IC, M, LCup		Mexico: Jalisco	Leaf	2014-10-09	20.652617 N 102.356936 W	San Gabriel	Ojo de Agua	MH024840	Bean common mosaic virus	BCMV	Potyvirus	Potyviridae	10069	99	97	MK069985		BCMV	~900	715	MG601982
		CJ16-2	SAMN06246786	P. vulgaris	NI	NI	R5	LCur, M		Mexico: Jalisco	Leaf	2014-10-09	20.652617 N 102.356931 W													BCMV	~900	720	MG601983
		CJ16-5	SAMN06246787	P. vulgaris	NI	NI	R5	LCur		Mexico: Jalisco	Leaf	2014-10-09	20.652617 N 102.356925 W													ND
CJ17-4Ls	SRX3217974	CJ17-4	SAMN06246788	P. vulgaris	U	U	R6	LCur, S	ID	Mexico: Jalisco	Leaf	2014-10-09	20.718592 N 102.438081 W	Arandas	El Tule	KT456287	Phaseolus vulgaris alphaendornavirus 1	PvEV-1	Alphaendornavirus	Endornaviridae	13514	96	95	No Submitted		PvEV-1	~1020	659	MG601997	Partial assembled genome with stop codons
																AB719398	Phaseolus vulgaris alphaendornavirus 2	PvEV-2	Alphaendornavirus	Endornaviridae	14753	99.5	98	No Submitted		PvEV-2	~990	966	MG602002	Partial assembled genome with stop codons
CJ20-6Ls	SRX3217975	CJ20-6	SAMN06246789	P. vulgaris	U	U	R6	B, GVB, LCur, M		Mexico: Jalisco	Leaf	2014-10-10	20.723814 N 102.451664 W	Arandas	El Refugio	KU896809	Bean common mosaic virus	BCMV	Potyvirus	Potyviridae	10065	99	99	MG640406		BCMV	~900	712	MG601984
CJ20-7Ls	SRX3217976	CJ20-7	SAMN06246790	P. vulgaris	U	U	R6	LCur, M	ID	Mexico: Jalisco	Leaf	2014-10-10	20.723814 N 102.451658 W	Arandas	El Refugio	KU896809	Bean common mosaic virus	BCMV	Potyvirus	Potyviridae	10067	99	98	MG640407		BCMV	~900	716	MG601977
CJ25-56Lc	SRX3217977	CJ25	SAMN06246791	P. vulgaris	U	U	R6	B, CLL, LCur, M	ALS, PM	Mexico: Jalisco	Leaf	2014-10-11	20.900525 N 102.367169 W	Arandas	Santa María	KU896809	Bean common mosaic virus	BCMV	Potyvirus	Potyviridae	10077	99	99	MK069986		BCMV	~900	720	MG601985
																KY659304	Bean common mosaic necrosis virus	BCMNV	Potyvirus	Potyviridae	9649	99	99	MK069982		BCMNV	~900	590	MG582652
		CJ25-5	SAMN06246792	P. vulgaris	NI	NI	R6	B, LCur, M, YM	ALS, ID	Mexico: Jalisco	Leaf	2014-10-11	20.900525 N 102.367167 W													BCMV	~900	720	MG601972
																										BCMNV	~900	734	MG582653
		CJ25-6	SAMN06246793	P. vulgaris	NI	NI	R6	B, LCur, M, YM	ALS, PM	Mexico: Jalisco	Leaf	2014-10-11	20.900525 N 102.367178 W													BCMV	~900	720	MG601974
																										BCMNV	~900	692	MG582654
CJ30-2Ls	SRX3217978	CJ30	SAMN06246794	P. vulgaris	U	Peruano	R8	GVB		Mexico: Jalisco	Leaf	2014-10-18	20.279153 N 102.372642 W	Yurecuaro	Rancho Nuevo	KU896809	Bean common mosaic virus	BCMV	Potyvirus	Potyviridae	10072	99	99	MG640408		BCMV	~900	715	MG601986
CJ30-5Ls	SRX3217979	CJ30-5	SAMN06246795	P. vulgaris	U	Peruano	R8	GVB		Mexico: Jalisco	Leaf	2014-10-18	20.279153 N 102.372653 W	Yurecuaro	Rancho Nuevo	KU896809	Bean common mosaic virus	BCMV	Potyvirus	Potyviridae	10072	99	99	MG640409		BCMV	~900	716	MG601987
Samples of wild bean
SJ8-5Ls	SRX3217983	SJ8-5	SAMN06246819	P. leptostachyus	NA	Wild bean	R6 y R8	B		Mexico: Jalisco	Leaf	2015-03-25	20.627083 N 101.983833 W	Manuel Doblado	Acumbaro	MH024840	Bean common mosaic virus	BCMV	Potyvirus	Potyviridae	10076	99	97	MG640405		BCMV	~900	719	MG601973
																AF023848	Peanut mottle virus	PeMoV	Potyvirus	Potyviridae	9744	99	98	MG640414		PeMoV	~980	936	MG602004
SJ9-2Ls	SRX4594735	SJ9-2	SAMN06246820	P. vulgaris	NA	Wild bean	R5	IC		Mexico: Jalisco	Leaf	2015-03-26	20.704 N 102.3415 W	Arandas			ND	ND								ND
SJ9-34Lc	SRX3217982	SJ9	SAMN06246832	P. vulgaris	NA	Wild bean	R5	B, M	ID	Mexico: Jalisco	Leaf	2015-03-25	20.704 N 102.3415 W	Arandas		MH024840	Bean common mosaic virus	BCMV	Potyvirus	Potyviridae	10073	99	97	MK069987		BCMV	~900	716	MG601988
		SJ9-3	SAMN06246833	P. vulgaris	NA	Wild bean	R5	NS	G	Mexico: Jalisco	Leaf	2015-03-26	20.704 N 102.341511 W	Arandas												ND
		SJ9-4	SAMN06246834	P. vulgaris	NA	Wild bean	R5	NS	G	Mexico: Jalisco	Leaf	2015-03-26	20.704 N 102.341517 W	Arandas												ND
SJ10-3Ls	SRX4594744	SJ10-3	SAMN06246821	P. coccineus	NA	Wild bean	R6	CLL	R	Mexico: Jalisco	Leaf	2015-03-26	20.6781 N 102.3486 W	Arandas		NA	Badnavirus-like sequence	PcBV-SJ10-3	Putative Badnavirus	Caulimoviridae	2604	NA	NA	No Submitted		PcBV-SJ10-3	~1400	1344	No Submitted	Badnavirus-like sequence
																NA	Pararetrovirus-like sequence	PcPRV-SJ10-3	Not assigned	Caulimoviridae	2588	NA	NA	No Submitted		PcPRV-SJ10-3	~2000	1929	No Submitted	Pararetrovirus-like sequence
SJ11-5Ls	SRX4594733	SJ11-5	SAMN06246822	P. vulgaris	NA	Wild bean	R6	NS		Mexico: Jalisco	Leaf	2015-03-26	20.672983 N 102.350117 W	Arandas			ND	ND								ND
SJ12Ls	SRX3217984	SJ12	SAMN06246823	P. leptostachyus	NA	Wild bean	R7 y R8	NS	PM	Mexico: Jalisco	Leaf	2015-03-26	20.650917 N 102.354617 W	Ayotlan	Betania	KY659304	Bean common mosaic necrosis virus	BCMNV	Potyvirus	Potyviridae	9655	99	99	MG640393		BCMNV	~900	755	MG582655
SJ14-3Ls	SRX4594732	SJ14-3	SAMN06246824	P. vulgaris	NA	Wild bean	R8	IC		Mexico: Jalisco	Leaf	2015-03-27	20.649783 N 102.353667 W	Ayotlan	Betania		ND	ND								ND
SJ19-24678Lc	SRX3217981	SJ19	SAMN06246826	P. vulgaris	NA	Wild bean	R6	NS	ID, R	Mexico: Jalisco	Leaf	2015-03-27	20.718283 N 102.437833 W	Arandas	El Tule		ND	ND								ND
		SJ19-2	SAMN06246827	P. vulgaris	NA	Wild bean	R8	NS	ALS, Ant, ID	Mexico: Jalisco	Leaf	2015-03-27	20.718283 N 102.437839 W													ND
		SJ19-4	SAMN06246828	P. vulgaris	NA	Wild bean	R8	NS	ALS, Ant, R	Mexico: Jalisco	Leaf	2015-03-27	20.718283 N 102.437847 W													ND
		SJ19-6	SAMN06246829	P. vulgaris	NA	Wild bean	R8	NS	ALS, ID	Mexico: Jalisco	Leaf	2015-03-27	20.718283 N 102.43785 W													ND
		SJ19-7	SAMN06246830	P. vulgaris	NA	Wild bean	R8	NS	ALS, ID	Mexico: Jalisco	Leaf	2015-03-27	20.718283 N 102.437856 W													ND
		SJ19-8	SAMN06246831	P. vulgaris	NA	Wild bean	R8	NS	R, ID	Mexico: Jalisco	Leaf	2015-03-27	20.718283 N 102.437858 W													ND
SJ21Ls	SRX4594745	SJ21	SAMN06246825	P. vulgaris	NA	Wild bean	R6	CLL	ALS	Mexico: Jalisco	Leaf	2015-03-27	20.72365 N 102.4517 W	Arandas			ND	ND								ND
Nayarit
Samples of domesticated bean
CN2Ls	SRX3217980	CN2	SAMN06246796	P. vulgaris	Coranay	Negro opaco	R6	YMot		Mexico: Nayarit	Leaf	01-Jan-14	21.825714 N 105.185575 W	Santiago Ixcuintla		KY659304	Bean common mosaic necrosis virus	BCMNV	Potyvirus	Potyviridae	9652	99	99	MG640394		BCMNV	~900	691	MG582656
																KC774019	Cowpea mild mottle virus	CPMMV	Carlavirus	Betaflexiviridae	8191	100	98	MK069989		CPMMV	~800	769	MF667540
CN3Ls	SRX3217971	CN3	SAMN06246797	P. vulgaris	Coranay	Negro opaco	R6	GVB, LCur		Mexico: Nayarit	Leaf	01-Jan-14	21.825714 N 105.185583 W	Santiago Ixcuintla		KY659304	Bean common mosaic necrosis virus	BCMNV	Potyvirus	Potyviridae	9633	99	99	MK069983		BCMNV	~900	737	MG582657
																MK202584	Bean-associated cytorhabdovirus	BaCV	Cytorhabdovirus	Rhabdoviridae	13427	99	97	MT792847		BaCV	~5100	5087	No Submitted
CN16Ls	SRX3217972	CN16	SAMN06246798	P. vulgaris	U	Peruano	R5 y R6	M		Mexico: Nayarit	Leaf	01-Jan-14	21.035633 N 104.417367 W	Ixtlan del Rio	Mexpan	MH024840	Bean common mosaic virus	BCMV	Potyvirus	Potyviridae	10053	99	97	MK069988		BCMV	~900	716	MG601989
CN22Ls	SRX3217989	CN22	SAMN06246799	P. vulgaris	U	Peruano	R6	M, DLR		Mexico: Nayarit	Leaf	01-Jan-14	21.192897 N 105.14735 W	Compostela	Las Varas	KU896809	Bean common mosaic virus	BCMV	Potyvirus	Potyviridae	10051	99	99	MG640410		BCMV	~900	712	MG601990
CN25Ls	SRX3217988	CN25	SAMN06246800	P. vulgaris	Jamapa	Negro opaco	R6	CLL, GVB, LCr		Mexico: Nayarit	Leaf	01-Jan-14	21.192897 N 105.147342 W	Compostela	Las Varas	KY659304	Bean common mosaic necrosis virus	BCMNV	Potyvirus	Potyviridae	9632	99	99	MG640395		BCMNV	~900	682	MG582658
																AF173555	Bean golden yellow mosaic virus DNA A	BGYMV DNA A	Begomovirus	Geminiviridae	2644	100	99	MG659315		BGYMV	~550	537	MG602003
																AF173556	Bean golden yellow mosaic virus DNA B	BGYMV DNA B	Begomovirus	Geminiviridae	2602	100	96	MK241785		NR	NA	NA	NA
CN30Ls	SRX3217991	CN30	SAMN06246801	P. vulgaris	Mayocoba	Yellow bean	R5 y R6	CLL, RCV, Y		Mexico: Nayarit	Leaf	01-Jan-14	21.939864 N 105.18395 W	Ruíz	Vado de San Pedro	KU896809	Bean common mosaic virus	BCMV	Potyvirus	Potyviridae	10052	99	99	MG640411		BCMV	~900	716	MG601975
																KY659304	Bean common mosaic necrosis virus	BCMNV	Potyvirus	Potyviridae	9652	99	99	MG640396		BCMNV	~900	739	MG582659
																NA	Bean latent virus DNA A	BLV DNA A	Begomovirus	Geminiviridae	2613	NA	NA	MN158325		BLV	~940	878	MN166201	Novel begomovirus
																NA	Bean latent virus DNA B	BLV DNA B	Begomovirus	Geminiviridae	2566	NA	NA	MN158326		NR	NA	NA	NA
CN31Ls	SRX3217990	CN31	SAMN06246802	P. vulgaris	Mayocoba	Yellow bean	R5 y R6	LCur, NLL		Mexico: Nayarit	Leaf	01-Jan-14	21.939864 N 105.183944 W	Ruíz	Vado de San Pedro	MH024840	Bean common mosaic virus	BCMV			10027	99	97	MG640412		BCMV	~900	717	MG601978
																KY659304	Bean common mosaic necrosis virus	BCMNV			9636	99	99	MG640397		BCMNV	~900	744	MG582660
CN48Ls	SRX3217993	CN48	SAMN06246803	P. vulgaris	Jamapa	Negro opaco	R6	LCup, M, NLL		Mexico: Nayarit	Leaf	01-Jan-14	21.982336 N 105.272356 W	Tuxpan	San Vicente	KY659304	Bean common mosaic necrosis virus	BCMNV			9651	99	99	MG640398		BCMNV	~900	891	MG582661
CN61Ls	SRX3217992	CN61	SAMN06246804	P. vulgaris	U	Peruano	R6	CLL, M, NLL		Mexico: Nayarit	Leaf	01-Jan-14	20.934544 N 105.078328 W	Bahia de Banderas	Las Cañadas	KU896809	Bean common mosaic virus	BCMV			10056	99	99	MG640413		BCMV	~900	719	MG601976
																KY659304	Bean common mosaic necrosis virus	BCMNV			9650	99	99	MG640399		BCMNV	~900	734	MG582662
																AF173555	Bean golden yellow mosaic virus DNA A	BGYMV DNA A			2644	100	99	MK241786		BGYMV	~550	532	No Submitted
																AF173556	Bean golden yellow mosaic virus DNA B	BGYMV DNA B			2602	100	95	MK241787		NR	NA	NA	NA
Samples of wild bean
SN35Ls	SRX4594734	SN35	SAMN06246835	P. lunatus	NA	Wild bean	R8	NS	ID	Mexico: Nayarit	Leaf	2015-03-30	21.152017 N 104.4679 W	Jala	Coapan	NA	Badnavirus-like sequence	PluBV-SN35	Putative Badnavirus	Caulimoviridae	1378	NA	NA	No Submitted		PluBV-SN35	~1500	1377	No Submitted	Badnavirus-like sequence
																NA	Pararetrovirus-like sequence	PluPRV-SN35	Not assigned	Caulimoviridae	1440	NA	NA	No Submitted		PluPRV-SN35	~1400	1377	No Submitted	Pararetrovirus-like sequence
																NA	Phaseolus lunatus alphaendornavirus	PluEV	Putative Alphaendornavirus	Endornaviridae	2878	NA	NA	MT792849		PluEV	~1500	1090	No Submitted	Partial assembled genome of RdRp domain of a putative new alphaendornavirus
SN39-1Ls	SRX3217986	SN39-1	SAMN06246836	P. acutifolius	NA	Wild bean	R9	Y	ID	Mexico: Nayarit	Leaf	2015-03-30	21.030883 N 104.47585 W	Ahuacatlán			ND	ND								ND
SN40-1Ls	SRX4594743	SN40-1	SAMN06246837	P. microcarpus	NA	Wild bean	R8	NS		Mexico: Nayarit	Leaf	2015-03-31	21.02 N 104.4757 W	Ahuacatlán			ND	ND								ND
SN41-1Ls	SRX4594742	SN41-1	SAMN06246838	P. vulgaris	NA	Wild bean	R9	NS		Mexico: Nayarit	Leaf	2015-03-31	20.9971 N 104.478622 W	Ahuacatlán			ND	ND								ND
SN41-2345Lc	SRX4594747	SN41	SAMN06246842	P. vulgaris	NA	Wild bean	R9	NS	R, ID	Mexico: Nayarit	Leaf	2015-03-31	20.9971 N 104.478625 W	Ahuacatlán			ND	ND								ND
		SN41-2	SAMN06246843	P. vulgaris	NA	Wild bean	R9	IC	R, ID	Mexico: Nayarit	Leaf	2015-03-31	20.9971 N 104.478633 W													ND
		SN41-3	SAMN06246844	P. vulgaris	NA	Wild bean	R9	IC	R, ID	Mexico: Nayarit	Leaf	2015-03-31	20.9971 N 104.478636 W													ND
		SN41-4	SAMN06246845	P. vulgaris	NA	Wild bean	R9	IC	R, ID	Mexico: Nayarit	Leaf	2015-03-31	20.9971 N 104.478617 W													ND
		SN41-5	SAMN06246846	P. vulgaris	NA	Wild bean	R9	NS	PM, R	Mexico: Nayarit	Leaf	2015-03-31	20.9971 N 104.478631 W													ND
SN42-1Ls	SRX3217987	SN42-1	SAMN06246839	P. coccineus	NA	Wild bean	R6	CLL, GVB, M	ID	Mexico: Nayarit	Leaf	2015-03-31	20.98 N 104.470833 W	Ahuacatlán			ND	ND								ND
SN44-5Ls	SRX3217985	SN44-5	SAMN06246840	P. vulgaris	NA	Wild bean	R8	LCr	ID	Mexico: Nayarit	Leaf	2015-03-31	21.14575 N 104.484083 W	Jala		KY659304	Bean common mosaic necrosis virus	BCMNV			9652	99	99	MK069984		BCMNV	~900	635	MG582663
SN47Ls	SRX4594746	SN47	SAMN06246841	P. acutifolius	NA	Wild bean	R8	IC		Mexico: Nayarit	Leaf	2015-03-31	21.033567 N 104.348117 W	Ixtlan del Rio			ND	ND								ND
* Stages of development according to Fernández et al., 1986. R5: Preflowering (50% of plants with flower buds); R6: Flowering (at least one open flower in 50% of plants); R7: Pod formation (at least one pod in 50% of plants); R8: Pod filling (seed filling in the first formed pods in 50% of the plants ); R9: Maturity (first pod begins to discolor and dry in 50 % of the plants).
Plants in wild populations can have in the reproductive stage buds, flowers, unripe and mature pods (R5 - R9).
Abbreviations
NR	Not realized
NA	Not applicable
U	Unidentified
ND	Not detected
B	Blistering
CLL	Chlorotic local lesions
DLR	Downward leaf roll
GVB	Green vein banding
IC	Interveinal chlorosis
LCr	Leaf crinkling
LCup	Leaf cupping
LCur	Leaf curling
M	Mosaic
NLL	Necrotic local lesions
NS	No symptoms
RCV	Reddish colored veins
S	Stunting
Y	Yellowing
YM	Yellow mosaic
YMot	Yellow mottling
G	Galls
ID	Insect damage
ALS	Angular leaf spot
Ant	Anthracnose
R	Rust
PM	Powdery mildew

## Sheet: Supplementary Table S2
Supplementary Table S2: Primers used for the confirmation of the viruses identified by sRSA
Primer name	Primer sequence (5´-3´)	Tm (°C)	Specificity	Acronym
BaCV-F	GGC AGG AAG AAG AAA ATT GGG AG	59	Bean-associated cytorhabdovirus	BaCV
BaCV-R	TGA CCA CGG CGA TCA TCT TT
BCMV-F	GTA GGA TGC GGA GAA TCT GTG CA	59	Bean common mosaic virus	BCMV
BCMV-R	GGC TGC TGC CTT CAT CTG T
BCMNV-F	TTT GCC TTA CGC ATT GGA C	54	Bean common mosaic necrosis virus	BCMNV
BCMNV-R	CCT TGG GTA CTC ACA GGT T
BGYMV_A-F	AAT GCG TCG TCG ACG AAT GGC T	61	Bean golden yellow mosaic virus	BGYMV
BGYMV_A-R	GAA CGG ATC TTC GTC AAA GCG CC
BLV_AC1F	CCG CAC TCC AAG TCG ATT CT	61	Bean latent virus	BLV
BLV_AC1R	TGG GCA ACC TCA TCT ACA CG
CpMMV-F	AGC GGG CAA GAC AAC TTT AAT AAG	55	Cowpea mild mottle virus	CPMMV
CpMMV-R	ACC CAG GTA AAG ATG GTC G
PeMoV-F	CAG ACA AAG GAA CCA GAT GTT G	54	Peanut mottle virus	PeMoV
PeMoV-R	GTG AGC CAC TCA CAC TAT AGA TC
PvEV_1-F	ACA TTA CAC CTC TTA ATG GGG G	55	Phaseolus vulgaris alphaendornavirus 1	PvEV-1
PvEV_1-R	GAG ACC ACA AGT CAT TAT GGA CC
PvEV_2-F	GAG GTC AAT CAT GTC AAG GGC A	58	Phaseolus vulgaris alphaendornavirus 2	PvEV-2
PvEV_2-R	GCA TGT AAC CTG ATG TCA TCC GC
PlepEV-F	TAA GAA CGA CCC CAA CGA CG	59	Putatuve Phaseolus leptostachyus alphaendornavirus	PlepEV
PlepEV-R	TAC CAG AAG CCC ACC GTT TG
PluEV-F	TGC CGT ATA AAC GAG CCA GG	59	Putative Phaseolus lunatus alphaendornavirus	PluEV
PluEV-R	CAC CTG AGG TGT AAT GCA CG
PcBV_SJ103-F	ACA GGA ATA GCT GGT CAA GCC	59	Phaseolus coccineus badnavirus-like sequence SJ10-3	PcBV-SJ10-3
PcBV_SJ103-R	TGT CCG CCC ATA GTC TTG AG
PcPRV_SJ103-F	GCA ACA GAT GCT ACA TTT GCG	59	Phaseolus coccineus pararetrovirus-like sequence SJ10-3	PcPRV-SJ10-3
PcPRV_SJ103-R	CGT GTC CTC TGA GAT GGA AAT CAA
PluBV_SN35-F	TGA CGG TGA ACA GCT AGA ACT	59	Phaseolus lunatus badnavirus-like sequence SN35	PluBV-SN35
PluBV_SN35-R	ACA GCT TTT CGT GTT CTC CTA GT
PluPRV_SN35-F	TCC CAG AAG ATG CTC AAA TCT CA	59	Phaseolus lunatus pararetrovirus-like sequence SN35	PluPRV-SN35
PluPRV_SN35-R	TTG TAT CCA GCC ATG CTC CG
PvBV_CG17-F	ACA GGA ATA GCT GGT CAA GCC	59	Phaseolus vulgaris badnavirus-like sequence CG17	PvBV-CG17
PvBV_CG17-R	TGT CCG CCC ATA GTC TTG AG

## Sheet: Supplementary Table S3
Supplementary Table S3: Number of raw and clean reads obtained for high throughput sequencing of the sRNA libraries of domesticated and wild bean from the Mesoamerican center of domestication of common bean and Nayarit, Mexico
Library	No. total reads	No. clean reads	Reads mapped to host		Reads unmapped to host
			Number of reads	% of the total reads	Number of reads	% of the total reads
CG1Ls	14946363	14556811	11722271	80.5277	2834540	19.4723
CG3Ls	8259152	7052003	5733203	81.2989	1318800	18.7011
CG9Ls	6959319	2666735	2212053	82.9499	454682	17.0501
CG13Ls	9844084	7095024	6309536	88.929	785488	11.071
CG17Ls	12070357	10634748	8226361	77.3536	2408387	22.6464
CG18Ls	52301890	49201580	38110374	77.4576	11091206	22.5424
CG28Ls	11685718	11083566	6964279	62.8343	4119287	37.1657
CG32Ls	11231065	10669463	7465088	69.9669	3204375	30.0331
CG43Ls	9757696	9236896	5674424	61.4322	3562472	38.5678
CG45Ls	10539792	10268360	7286165	70.9574	2982195	29.0426
SG1Ls	6242100	5956768	4696962	78.8508	1259806	21.1492
SG3-5Ls	6070986	5702489	4193462	73.5374	1509027	26.4626
SG5-136Lc	5542482	4625123	3439302	74.3613	1185821	25.6387
SG5Ls	6392737	5263633	4025948	76.4861	1237685	23.5139
SG6-1Ls	6451194	6142180	3721205	60.5844	2420975	39.4156
SG7-245Lc	5847924	5594901	4020298	71.8565	1574603	28.1435
SG27-3Ls	6012037	5672311	2759172	48.6428	2913139	51.3572
SG29Ls	5609981	5269147	2638950	50.0831	2630197	49.9169
SG30CLs	6422576	5023189	2565019	51.0636	2458170	48.9364
SG66Ls	6562855	4019009	3376486	84.0129	642523	15.9871
CJ16-25Lc	6540076	5738930	3972770	69.2249	1766160	30.7751
CJ17-4Ls	6498047	5269479	4107372	77.9465	1162107	22.0535
CJ20-6Ls	6459402	6203136	2960633	47.728	3242503	52.272
CJ20-7Ls	6242340	5924609	3884183	65.5602	2040426	34.4398
CJ25-56Lc	4502313	3996812	2410580	60.3126	1586232	39.6874
CJ30-2Ls	6549279	6288951	3537656	56.2519	2751295	43.7481
CJ30-5Ls	7080924	6001710	3531922	58.8486	2469788	41.1514
SJ8-5Ls	5728049	5531415	1881340	34.0119	3650075	65.9881
SJ9-2Ls	3476360	2881155	2245536	77.9387	635619	22.0613
SJ9-34Lc	5865479	5455205	2661978	48.797	2793227	51.203
SJ10-3Ls	5553004	5327438	2779224	52.1681	2548214	47.8319
SJ11-5Ls	6772456	6439708	4422532	68.676	2017176	31.324
SJ12Ls	5924415	3760367	1585660	42.1677	2174707	57.8323
SJ14-3Ls	6767689	6052408	4114369	67.979	1938039	32.021
SJ19-24678Lc	5827552	5288636	3663428	69.2698	1625208	30.7302
SJ21Ls	6242430	4831850	3626757	75.0594	1205093	24.9406
CN2Ls	12972885	4706236	3525924	74.9203	1180312	25.0797
CN3Ls	10804492	9994439	6995038	69.9893	2999401	30.0107
CN16Ls	6031982	2392033	1850963	77.3803	541070	22.6197
CN22Ls	6012436	2005835	1592952	79.4159	412883	20.5841
CN25Ls	11075988	10742915	6678451	62.1661	4064464	37.8339
CN30Ls	10714322	9595437	6902359	71.9338	2693078	28.0662
CN31Ls	9058834	6895534	5325119	77.2256	1570415	22.7744
CN48Ls	8191367	6539962	4775118	73.0145	1764844	26.9855
CN61Ls	10849435	10447004	6283320	60.1447	4163684	39.8553
SN35Ls	6421247	6205085	3649542	58.8153	2555543	41.1847
SN39-1Ls	6567814	6047640	4267829	70.5702	1779811	29.4298
SN40-1Ls	6452095	6139626	4290774	69.8866	1848852	30.1134
SN41-1Ls	6947725	6137174	4140389	67.4641	1996785	32.5359
SN41-2345Lc	6100342	3583955	2508130	69.9822	1075825	30.0178
SN42-1Ls	6964230	5026856	2490180	49.5375	2536676	50.4625
SN44-5Ls	6553019	6160094	4209488	68.3348	1950606	31.6652
SN47Ls	7227459	6578708	4270861	64.9194	2307847	35.0806
Total	443725795	379924278	260282935		119641343
Min	3476360	2005835	1585660	34.0119	412883	11.071
Max	52301890	49201580	38110374	88.929	11091206	65.9881
Average		7.16838e+06	4.911e+06	67.1854	2.25738e+06	32.8146

## Sheet: Supplementary Table S4
Supplementary Table S4: Contigs identified through Blastx with amino acid identity to reference viruses assembled from small RNA libraries from samples of domesticated and wild bean plants collected in the Mesoamerican center of domestication of common bean and Nayarit, Mexico
Library	Reference	Length (aa)	Coverage		No. of contigs	Depth	Depth (Norm)	Identity (%)	Iden Max (%)	Iden Min (%)	Genus	Description
			(aa)	(%)
CG1Ls	ACV74337.1	1970	450	22.8	16	66.6	4.8	65.21	81.82	50	Badnavirus	Pelargonium vein banding virus, complete genome.
	CAH17540.1	193	83	43	3	67.5	4.9	79.52	94.74	70.73	Badnavirus	Canna streak virus partial gene for polyprotein, genomic RNA, clone 7.6.
	AAO73352.1	187	49	26.2	2	74	5.3	63.27	77.78	54.84	Badnavirus	Taro bacilliform virus isolate NC1 coat protein gene, partial cds.
	ABE77344.1	1916	321	16.8	11	76.1	5.5	63.98	78.79	56.25	Badnavirus	Dracaena mottle virus, complete genome.
	APY26397.1	1958	285	14.6	9	75.7	5.5	62.84	78.95	54.55	Badnavirus	Cacao yellow vein-banding virus isolate ICS27, complete genome.
	AHX37579.1	1948	256	13.1	10	56.4	4.1	62.78	94.12	51.43	Badnavirus	Blackberry Virus F isolate BBV-3X, complete genome.
	ANV20884.1	1914	251	13.1	10	68.9	5	62.71	82.61	46.34	Badnavirus	Dioscorea bacilliform AL virus isolate DBALV-[3RT], complete genome.
	AAN75640.1	1881	208	11.1	7	46.8	3.4	66.23	80	52.27	Badnavirus	Taro bacilliform virus complete genome.
CG3Ls	AIS37555.1	434	61	14.1	1	57.7	10	46.03	46.03	46.03	Mitovirus	Cytospora ribis mitovirus 1 RNA-dependent RNA polymerase (RdRp) gene, partial cds.
CG17Ls	ACV74337.1	1970	561	28.5	18	47.1	5	67.85	86.21	34	Badnavirus	Pelargonium vein banding virus, complete genome.
	APY26397.1	1958	474	24.2	14	52.7	5.5	61.44	90.48	29.17	Badnavirus	Cacao yellow vein-banding virus isolate ICS27, complete genome.
	ARQ18771.1	193	41	21.2	2	44.7	4.7	92.68	95	90.48	Badnavirus	Jujube yellow mottle China virus isolate LNCYJuwz polyprotein gene, partial cds.
	ABE77344.1	1916	280	14.6	9	73	7.7	73.33	94.12	59.26	Badnavirus	Dracaena mottle virus, complete genome.
CN3Ls	ABV56128.1	548	464	84.7	2	956.9	105.1	24.84	31.85	22.06	Cytorhabdovirus	Lettuce yellow mottle virus, complete genome.
	APR74648.1	491	445	90.6	2	1930.2	212	27.52	36.89	24	Cytorhabdovirus	Rice stripe mosaic virus isolate GD-LD, complete genome.
	AJP67516.1	295	232	78.6	1	1782.1	195.8	21.48	21.48	21.48	Cytorhabdovirus	Barley yellow striate mosaic virus strain Hebei, complete genome.
	ADE61677.1	2058	1914	93	7	1014.9	111.5	38.37	58.26	26.01	Cytorhabdovirus	Cacao swollen shoot Togo A virus, polymerase protein
CN30Ls	CAP07288.1	65	46	70.8	1	844.5	95.7	52.17	52.17	52.17	Begomovirus	Abutilon mosaic virus DNA-B south africa isolate, complete genome.
	AAD09669.1	258	41	15.9	1	1489.4	168.8	82.93	82.93	82.93	Begomovirus	Tomato mottle Taino virus component B, complete sequence.
	AAA46323.1	293	293	100	1	3431.3	388.8	82.25	82.25	82.25	Begomovirus	Bean golden yellow mosaic virus-[Puerto Rico] DNA2, complete sequence.
SG29Ls	BAV69339.1	4785	670	14	2	150.1	32.9	27.14	30.83	22.44	NA	Psophocarpus tetragonolobus endornavirus genomic RNA, complete genome.
	AFV91541.1	4027	539	13.4	2	153.4	33.6	29.06	29.95	26.95	Alphaendornavirus	Grapevine endophyte endornavirus, complete genome.
	CAA51859.1	553	57	10.3	1	139.8	30.6	34.48	34.48	34.48	Closterovirus	Beet yellows virus (isolate German BYV-G) genes for putative membrane-binding protein, heat shock 70-related protein, coat protein homolog and coat protein.
SJ8-5Ls	AHC13194.1	1812	556	30.7	15	111.5	21.5	57.78	84.62	28.57	NA	Citrus endogenous pararetrovirus clone CB16-3, complete genome.
	AHN13810.1	758	137	18.1	3	104.9	20.2	51.82	58.33	47.83	NA	Aristotelia chilensis virus 1 isolate AcPLV-1 movement protein and reverse transcriptase genes, complete cds.
SJ10-3Ls	ALZ41795.1	694	642	92.5	4	117.4	23.1	31.17	41.46	25.59	NA	Botryosphaeria dothidea virus 1 strain XA-3 segment 2, complete sequence.
	ALZ41796.1	613	594	96.9	1	348.2	68.6	29.64	29.64	29.64	NA	Botryosphaeria dothidea virus 1 strain XA-3 segment 3, complete sequence.
	ALZ41794.1	758	498	65.7	6	70.7	13.9	56.75	71.76	48.04	NA	Botryosphaeria dothidea virus 1 strain XA-3 segment 1, complete sequence.
	ALZ41797.1	275	40	14.5	1	37.4	7.4	52.5	52.5	52.5	NA	Botryosphaeria dothidea virus 1 strain XA-3 segment 4, complete sequence.
	AAU20332.1	250	99	39.6	1	30.8	6.1	67.68	67.68	67.68	Umbravirus	Pea enation mosaic virus-2 strain UK RNA-dependent RNA-polymerase, hypothetical protein, phloem RNA movement protein, and cell-to-cell RNA movement protein genes, complete cds.
	AHC13194.1	1812	313	17.3	8	36.1	7.1	66.45	94.74	42.86	NA	Citrus endogenous pararetrovirus clone CB16-3, complete genome.
	AHN13810.1	758	107	14.1	2	36.6	7.2	58.88	60.27	55.88	NA	Aristotelia chilensis virus 1 isolate AcPLV-1 movement protein and reverse transcriptase genes, complete cds.
	ACB69773.1	674	124	18.4	1	74.4	14.7	32.54	32.54	32.54	Caulimovirus	Eupatorium vein clearing virus, complete genome.
	ARQ18771.1	193	79	40.9	2	193.5	38.1	58.23	71.05	46.34	Badnavirus	Jujube yellow mottle China virus isolate LNCYJuwz polyprotein gene, partial cds.
	ACV74337.1	1970	708	35.9	17	182.5	35.9	57.86	80.65	41.3	Badnavirus	Pelargonium vein banding virus, complete genome.
	AIL82378.1	176	64	36.4	3	214.1	42.2	76.14	83.33	71.05	Badnavirus	Dioscorea bacilliform virus isolate SG1 polyprotein gene, partial cds.
	ADO85704.1	193	64	33.2	2	422	83.1	71.88	73.08	71.05	Badnavirus	Musa balbisiana endogenous badnavirus isolate MBEBV-AP7 RT-RNaseH gene, partial cds.
	AHA62474.1	413	59	14.3	3	154.1	30.3	64.71	74.07	53.12	Badnavirus	Banana streak UL virus isolate Ug206 ORF III polyprotein gene, partial cds.
	AHX37579.1	1948	561	28.8	14	183.3	36.1	54.58	78.95	34.33	Badnavirus	Blackberry Virus F isolate BBV-3X, complete genome.
	APY26397.1	1958	556	28.4	13	174	34.3	55.09	79.17	41.3	Badnavirus	Cacao yellow vein-banding virus isolate ICS27, complete genome.
	AAK35158.1	456	48	10.5	2	34.7	6.8	58.33	72.22	50	Badnavirus	Spiraea yellow leaf spot virus polyprotein gene, partial cds.
	AIT58609.1	2031	420	20.7	13	193.3	38.1	55.1	79.17	38.1	Badnavirus	Yacon necrotic mottle virus isolate YV1, complete genome.
	CAA73043.1	149	42	28.2	2	33.2	6.5	45.76	50	42.42	Badnavirus	Pineapple bacilliform virus DNA for RT and RNaseH genes, partial.
	ANV20884.1	1914	340	17.8	8	213.4	42	56.82	85	38.46	Badnavirus	Dioscorea bacilliform AL virus isolate DBALV-[3RT], complete genome.
	ABE77344.1	1916	339	17.7	9	147.8	29.1	55.43	87.5	38.1	Badnavirus	Dracaena mottle virus, complete genome.
	AKA45798.1	1803	246	13.6	6	280.2	55.2	59.92	81.67	38.46	Badnavirus	Taro bacilliform CH virus isolate TaBCHV-2, complete genome.
	AQM50987.1	1909	239	12.5	6	164.3	32.3	55.2	75.86	40.21	Badnavirus	Wisteria badnavirus 1 isolate ZT-1, complete genome.
	ANV20893.1	1921	226	11.8	7	303.8	59.8	63.71	75.68	44.9	Badnavirus	Dioscorea bacilliform RT virus isolate DBRTV1-[3RT], complete genome.
	ABY53448.1	208	22	10.6	1	89.3	17.6	59.09	59.09	59.09	Badnavirus	Ambrosia asymptomatic virus 2 UKM-2007 isolate 05TGP00321.Bad3 polyprotein gene, partial cds.
	AMN88380.1	1789	195	10.9	8	185	36.4	58.97	77.78	45.45	Badnavirus	Grapevine roditis leaf discoloration-associated virus isolate BN, complete genome.
SJ19-24678Lc	AEM45994.1	849	584	68.8	1	682	145.7	62.16	62.16	62.16	Umbravirus	Pea enation mosaic virus-2 strain ID RNA-dependent RNA-polymerase, 33 kDa protein, long-distance movement protein, and cell-to-cell movement protein genes, complete cds.
	AEJ80235.2	257	57	22.2	1	361.8	77.3	38.6	38.6	38.6	Umbravirus	Opium poppy mosaic virus isolate PHEL5235, complete genome.
	CAA93799.1	285	56	19.6	1	169.3	36.2	37.5	37.5	37.5	Umbravirus	Groundnut rosette virus complete genome, strain MC1.
	AAN62864.1	244	187	76.6	1	371.5	79.4	64.71	64.71	64.71	Umbravirus	Tobacco bushy top virus, complete genome.
SN35Ls	CDO45228.1	344	118	34.3	2	111.4	20.1	36.84	40	32.5	NA	Arhar cryptic virus-I segment RNA-3, strain Hyderabad.
	ABB04857.1	347	189	54.5	2	109.8	19.8	40.21	42.86	36.36	NA	Raphanus sativus cryptic virus 2 dsRNA 3, complete sequence.
	AHN13810.1	758	256	33.8	5	154.5	27.9	60.81	94.12	51.43	NA	Aristotelia chilensis virus 1 isolate AcPLV-1 movement protein and reverse transcriptase genes, complete cds.
	AHC13194.1	1812	1276	70.4	24	198.9	35.9	56.25	88.24	32.05	NA	Citrus endogenous pararetrovirus clone CB16-3, complete genome.
	AGC24022.1	306	72	23.5	2	57.4	10.4	48.61	52.94	44.74	NA	Rhabdovirus YHG-2013 isolate IbRNLS coat protein gene, partial cds.
	AGQ21972.1	450	50	11.1	1	108.5	19.6	36	36	36	Dichorhavirus	UNVERIFIED: Citrus necrotic spot virus strain Jal-1 segment RNA1, complete sequence.
	AHA56693.1	650	85	13.1	1	118.9	21.5	37.23	37.23	37.23	Platypuvirus	Donkey orchid symptomless virus isolate Mariginiup11, complete genome.
	ACV74337.1	1970	987	50.1	30	123.4	22.3	56.45	92.86	34.69	Badnavirus	Pelargonium vein banding virus, complete genome.
	ADO85704.1	193	95	49.2	4	90.8	16.4	63.77	77.78	56.36	Badnavirus	Musa balbisiana endogenous badnavirus isolate MBEBV-AP7 RT-RNaseH gene, partial cds.
	AHX37579.1	1948	859	44.1	18	140.3	25.3	49.76	84.21	29.21	Badnavirus	Blackberry Virus F isolate BBV-3X, complete genome.
	AIL82378.1	176	81	46	5	72.9	13.2	81.1	90.48	75	Badnavirus	Dioscorea bacilliform virus isolate SG1 polyprotein gene, partial cds.
	AKH45593.1	193	73	37.8	3	108.9	19.7	62.5	77.78	56.36	Badnavirus	Badnavirus IAB-2015 isolate PT1 polyprotein gene, partial cds.
	AIT58609.1	2031	653	32.2	15	150	27.1	50.99	83.33	30	Badnavirus	Yacon necrotic mottle virus isolate YV1, complete genome.
	APY26397.1	1958	642	32.8	21	126.9	22.9	55.98	83.33	32.14	Badnavirus	Cacao yellow vein-banding virus isolate ICS27, complete genome.
	ABE77344.1	1916	624	32.6	14	112.1	20.3	53.83	95.24	33.65	Badnavirus	Dracaena mottle virus, complete genome.
	ANV20893.1	1921	619	32.2	15	133.9	24.2	55.09	88.89	26.02	Badnavirus	Dioscorea bacilliform RT virus isolate DBRTV1-[3RT], complete genome.
	AMN88380.1	1789	492	27.5	10	141.5	25.6	47.7	79.25	32.35	Badnavirus	Grapevine roditis leaf discoloration-associated virus isolate BN, complete genome.
	CAE81279.1	1816	490	27	10	128.4	23.2	48.32	81.82	33.33	Badnavirus	Cacao swollen shoot virus complete genome, isolate Peki.
	AHI90954.1	1892	480	25.4	9	157.9	28.5	44.79	82.61	29.47	Badnavirus	Hibiscus bacilliform virus GD1, complete genome.
	AHM92963.1	1838	428	23.3	8	110.7	20	44.88	66.07	31.91	Badnavirus	Banana streak CA virus, complete genome.
	ABS76283.1	2252	396	17.6	12	84.5	15.3	54.94	84.21	35.35	Badnavirus	Bougainvillea spectabilis chlorotic vein-banding virus from Taiwan, complete genome.
	ANN87818.1	1684	390	23.2	8	93.3	16.8	58.78	72.22	52.81	Badnavirus	Canna yellow mottle virus isolate CaYMV-C. indica, complete genome.
	ACF60613.1	1916	388	20.3	11	95.6	17.3	50.64	77.78	30	Badnavirus	Cycad leaf necrosis virus, complete genome.
	AAL18495.1	1983	386	19.5	7	116	21	46.38	72.73	31.67	Badnavirus	Citrus yellow mosaic virus, complete genome.
	ANV20878.1	1897	381	20.1	9	75	13.5	57.11	81.13	35.48	Badnavirus	Dioscorea bacilliform AL virus isolate DBALV-[2ALa], complete genome.
	AKA45798.1	1803	363	20.1	7	113.4	20.5	50.37	80.56	29.89	Badnavirus	Taro bacilliform CH virus isolate TaBCHV-2, complete genome.
	AIL82372.1	176	36	20.5	3	65.9	11.9	91.07	93.33	90	Badnavirus	Dioscorea bacilliform virus isolate FX1 polyprotein gene, partial cds.
	AIK01820.1	1925	351	18.2	7	153.1	27.7	47.06	72	33.01	Badnavirus	Piper yellow mottle virus isolate PB, complete genome.
	CEJ16363.2	1999	333	16.7	9	82.6	14.9	54.21	100	36.67	Badnavirus	Mulberry badnavirus 1 complete genome, isolate Lebanon34.
	AHM92957.1	1869	297	15.9	8	85	15.4	53.2	79.17	34.62	Badnavirus	Banana streak MY virus, complete genome.
	ACS44708.1	1792	281	15.7	8	89.1	16.1	56.58	87.5	33.98	Badnavirus	Sugarcane bacilliform Guadeloupe D virus isolate BataviaD, complete genome.
	ACN56746.1	794	234	29.5	6	81.9	14.8	56.7	77.78	42.86	Badnavirus	Sweetpotato badnavirus A, complete genome.
	CAJ24754.1	176	128	72.7	2	180.2	32.6	65.91	72.41	53.33	Badnavirus	Dioscorea bacilliform virus 1 gene for polyprotein, isolate SB10a_Dn.
SN42-1Ls	AGC25937.1	2027	383	18.9	5	193.5	47.9	40.59	68.75	29.62	NA	Piper DNA virus 1 hypothetical protein gene, partial cds.
	AHC13194.1	1812	713	39.3	8	130.2	32.2	38.51	74.55	24.43	NA	Citrus endogenous pararetrovirus clone CB16-3, complete genome.
	AFP95351.1	534	71	13.3	1	98.9	24.5	31.08	31.08	31.08	Caulimovirus	Soybean mild mottle pararetrovirus, complete genome.
	AAM53128.1	674	450	66.8	4	174.6	43.2	28.91	35.71	27.62	Caulimovirus	Mirabilis mosaic virus, complete genome.
	CAC41321.2	1674	307	18.3	3	226.6	56.1	31.51	58.33	28.66	Tungrovirus	Rice tungro bacilliform virus complete genome, isolate West Bengal.
	AEJ84486.1	722	277	38.4	5	114.6	28.4	53.72	77.78	40.29	Luteovirus	Soybean dwarf virus strain Y readthrough protein, coat protein, and movement protein genes, complete cds.
	ACV74337.1	1970	899	45.6	11	191.3	47.4	50.41	89.47	32.31	Badnavirus	Pelargonium vein banding virus, complete genome.
	CEJ16363.2	1999	654	32.7	8	196.2	48.6	42.93	100	31.09	Badnavirus	Mulberry badnavirus 1 complete genome, isolate Lebanon34.
	AAN75640.1	1881	564	30	6	225.1	55.7	39.45	87.5	29.17	Badnavirus	Taro bacilliform virus complete genome.
	AEE39279.1	1910	543	28.4	6	188.4	46.6	37.32	89.47	30.43	Badnavirus	Gooseberry vein banding virus isolate RIB9001, complete genome.
	AEI98823.2	1941	493	25.4	4	239.4	59.3	36.07	78.26	30.13	Badnavirus	Grapevine vein-clearing virus isolate LBC0903, complete genome.
	ABS76283.1	2252	484	21.5	7	209.8	51.9	44.63	81.82	32.18	Badnavirus	Bougainvillea spectabilis chlorotic vein-banding virus from Taiwan, complete genome.
	CAE81279.1	1816	445	24.5	7	166.6	41.2	39.79	90.91	24.17	Badnavirus	Cacao swollen shoot virus complete genome, isolate Peki.
	AEF56561.1	1837	433	23.6	8	182.4	45.2	43.91	88.24	31.73	Badnavirus	Fig badnavirus 1 isolate Arkansas 1, complete genome.
	AHI90954.1	1892	371	19.6	6	201.1	49.8	43.66	90.62	32.27	Badnavirus	Hibiscus bacilliform virus GD1, complete genome.
	AHG94942.1	1395	368	26.4	6	202.5	50.1	46.62	87.5	28.94	Badnavirus	Dioscorea bacilliform virus strain DBV8, partial genome.
	ALT14581.1	193	189	97.9	3	230.3	57	33.45	73.68	27.6	Badnavirus	Banana streak virus isolate DN3-7 ORFIII polyprotein gene, partial cds.
	AIL82378.1	176	146	83	5	153.7	38	64.5	88.24	36.36	Badnavirus	Dioscorea bacilliform virus isolate SG1 polyprotein gene, partial cds.
	ANA05350.1	96	65	67.7	1	220.9	54.7	46.38	46.38	46.38	Polerovirus	Pepo aphid-borne yellows virus isolate YT12-01 RNA-dependent RNA polymerase, coat protein, and movement protein genes, partial cds.
	AFK28046.1	1055	381	36.1	7	170.4	42.2	66.09	92.31	37.5	Polerovirus	Cucurbit aphid-borne yellows virus strain Sq/2003/7.2, complete genome.
	ABV01912.1	542	372	68.6	6	151.8	37.6	69.93	88.46	50	Polerovirus	Tobacco vein distorting virus, complete genome.
	AAU04781.1	1045	278	26.6	6	177.2	43.9	60.31	92.31	32.26	Polerovirus	Carrot red leaf virus strain UK-1, complete genome.
	APG31661.1	671	237	35.3	3	115.2	28.5	51.02	68.75	40.58	Polerovirus	Turnip yellows virus isolate Pintoi-VarA, partial genome.
	AAL77934.1	717	228	31.8	3	128.9	31.9	48.68	68.75	42.86	Polerovirus	Potato leafroll virus strain Noir, complete genome.
	ADD84815.1	1054	168	15.9	3	183.7	45.5	42.13	80	30.99	Polerovirus	Sugarcane yellow leaf virus isolate Haw73-6110, complete genome.
	ARU09827.1	644	121	18.8	2	110.7	27.4	36.89	50	30	Polerovirus	Cotton leafroll dwarf virus isolate CN-S5, partial genome.
	ADR74374.1	668	104	15.6	3	85	21	66.94	76.47	59.32	Polerovirus	Beet western yellows virus strain BJ genotype A, complete genome.
	AAF74543.1	262	78	29.8	1	193.1	47.8	37.97	37.97	37.97	Umbravirus	Groundnut rosette virus clone M12G3 orf3 mRNA, complete cds.
	AEM45994.1	849	366	43.1	12	111.1	27.5	74.29	92.59	64.29	Umbravirus	Pea enation mosaic virus-2 strain ID RNA-dependent RNA-polymerase, 33 kDa protein, long-distance movement protein, and cell-to-cell movement protein genes, complete cds.
	AHZ65104.1	581	205	35.3	5	157.9	39.1	69.58	81.82	64.21	Umbravirus	Opium poppy mosaic virus isolate Tropaeolum_NZ replication protein, polymerization protein, long distance movement protein, and cell-to-cell movement protein genes, partial cds.
	AIL27643.1	258	156	60.5	1	229	56.7	62.18	62.18	62.18	Umbravirus	Ethiopian tobacco bushy top virus isolate 18-2, complete genome.
	CTQ57207.1	839	131	15.6	9	144.6	35.8	75.53	81.82	69.57	Umbravirus	Groundnut rosette virus complete genome, strain MC1.

## Sheet: Supplementary Table S5
Supplementary Table S5: Nucleotide sequences of the virus-like identified in small RNA libraries of domesticated and wild bean from the Mesoamerican center of domestication of common bean and Nayarit, Mexico
>Phaseolus lunatus badnavirus-like sequence SN35 GAGGCTAGTTATCCTTTACAAGAATCCAAGAAGCTGGATTCAACTACATCCATCTGGGACTGGTCATGATCAGATTACACCTGTTGCACCGACCAGAAACAGGATCAAGAGTATTGCTCTTGATAAGGGATACACGGATCAACAGCAGACTCGGAATCCTCGGATCAATGGAGATCGATATGACCCGAGGAACAGAACTAGTTTACTTTACCCTTGGGCGAAACCTTATGACAATCAACGATTTCTATAATCACATAGAACTCGTCATATTAACCCTAGGATACGAATCATGGGTAGGAGGAGACGCCAACATACTGATAAGCCAAAGGCTCATAGGACGCCTTACCAAT…
>Phaseolus lunatus pararetrovirus-like sequence SN35 TTGGAGGCCTTATCTTCTCTAGGATCCGACAATGAAGATGAGGATGAAGATGATGAAGAAAACGACCCAGAGGACTTCTGCAAACCTCCTTCCTCACAGCACAGGAGATTTGGTCCCGACAGTGGTCCCTGGATCGGGATCAGGAGGCGACAAGAACCAGACCCAGACTGGAAATTCCTAAGATGCCTGGAGATCTTACAAGAAGAGGAATCCAAAACTCCGGGAAGATGCAACAGCCTCTCCAGATCTTTTCGTGTCCCTCACGCATCTCCAATTCCTTGTATGATGTTCAATACAGCCTCCAACGAAGATTTTCCTTCTCTTGAACGAAAGACTGATCCAGTCA…
>Phaseolus vulgaris badnavirus-like sequence CG17 GCCCTAGCACACAGAGCTGCCAGAAGTATAAGCAGAATTGCAAGAAGAGCAGCTCCGGTCAGGTCGCTAGAGTCAGTACTAAACCCTGACCAGGAAGTAAGACTATCCCATGAAGGAAGAGTCCGCATGGTAGATGCCGAAGTACTATACAGGAATAGCTGGTCAAGCCCACAACACAGGGTTTATGAGCACTACTCCACAGAAAACATCAGGGTCATTGATGATGAACAACTCGAGTTGTCCTTCATCACACCTCAATCTTTCCACAGAATTCAAGAAGCAGGATTCAGGTACATACACCTAGGGTTGGTAATGATCAGGTTACACCTGCTCCACCGACCAGAAACAG…
>Phaseolus coccineus badnavirus-like sequence SJ10-3 AGCCCCCCTCAAAGCAAGAAAACACTCATAAGTTAGCAGAGGAGCTAGCAGGCATAACAAACACACTACAGAACCTACACTTGTCTGAACACAAAGGCCTGCCACCCAAACCCGTACACAAGTTCTATTACCATAAAGACCCATACAAGATCCTAGAGGAAGTTAAGAAACAGAAATAATGGGATCTAGAACGGTAACACAGACTACCACAGAAAGACAACCCAGAGATGGCGGGAGGCCATCTACAGAATACAGGACTGAACCAACAAGATCAGTCCCCATGTTTGCAAGACCCGCAGAAACCAGGAGGGTTTCTGACTATGAGGACCAGATAAGGTCCTACAGA…
>Phaseolus coccineus pararetrovirus-like sequence SJ10-3 CGGAACTCTCAAAGAATGGTATCAAAAGTCTTGACTCCATAAACCAAGATCGCATGCATAATCTTGAAAGCACAGATGCAGTAATCTCAACCATCCACCATGAATTCCTAGGAAACGTAGAGGTAGCCAACAAGGAGATTCGAAAAGAATATTTTGAAATGAAGTGTTGTTCATTAAAGCTCGGAGATATCCAGCACCATTTCCAAAGGATGCAACAACGCTTTTACAGACTGAATGGCTACAATGATCCTAGTCTGAAGAGCACCTATGTGAGTTCACTTCCTGGAGAACTACAGGAAGAAATGTACAGGATGCTCAGTCTCCAAAATAGAGAAATCACTG…
